# Supplementary material for: An NMR-based metabolomics study on sea anemones Exaiptasia diaphana ( Rapp, 1829 ) with atrazine exposure
Source: Royal Society of Chemistry journal article supplement (doi:10.1039/d1mo00223f), 2021-09-20
Supplement: d1mo00223f1.xlsx [file d1mo00223f1.xlsx]

## Sheet: Sheet1
	Class	2-Oxocaproate	4-Aminobutyrate	Acetate	Adenosine	Alanine	Aspartate	Betaine	Choline	Citrate	Creatine	Creatinine	Cytidine	dCTP	Dimethyl sulfone	Ethanol	Formate	Glucose	Glutamate	Glutamine	Glycine	Guanosine	Histidine	Homoserine	Hydroxyacetone	Hypoxanthine	IMP	Inosine	Isoleucine	Lactate	Leucine	Lysine	Malate	Methanol	Methionine	myo-Inositol	O-Phosphocholine	Phenylalanine	Serine	sn-Glycero-3-phosphocholine	Succinate	Taurine	Thymidine	Trimethylamine	Tyrosine	Valine	Xylose	β-Alanine
Health_1_3_1	1	0.00267105	0.00137578	0.00367747	0.00020371	0.00693466	0.00390556	0.067043	0.0272425	0.00099826	0.0043841	0.00180368	1.492e-05	0.0001101	0.00550996	0.00064725	9.835e-05	0.00279435	0.00142255	0.00078259	0.00974722	0.00034085	0.00023465	0.00669962	0.00080233	0.00020804	0.00034964	0.00155093	0.00284468	0.00152851	0.0022153	0.00270099	0.00097375	0.0111464	0.00075828	0.00321581	0.00427247	0.00033892	0.0007249	0.00913628	0.00143485	0.0188416	0.00037202	0.0203073	0.0012637	0.00234109	0.00072909	0.00200654
Health_2_3_1	1	0.00205143	0.00133382	0.00302504	0.00011861	0.00673527	0.00547685	0.0701856	0.0261216	0.00083949	0.00395951	0.00150168	3.27e-06	9.375e-05	0.00621308	0.00044432	3.93e-05	0.00270934	0.00153481	0.00064458	0.00901773	0.00030311	0.00018371	0.00614698	0.00067697	0.00015267	0.00019882	0.00139804	0.0028396	0.00196203	0.00213878	0.00288412	0.00114566	0.0115692	0.00073507	0.00306685	0.00408188	0.00036234	0.00066775	0.0103217	0.00135844	0.0190887	0.00015291	0.0153733	0.00102349	0.00237274	0.00074957	0.00177636
Health_4_3_1	1	0.00273424	0.00211854	0.00425736	5.562e-05	0.00771771	0.00387587	0.0696949	0.0195897	0.00085184	0.00396324	0.0015784	1.34e-06	5.148e-05	0.0049142	0.00054298	7.68e-06	0.00320953	0.00131678	0.00069361	0.0110071	0.00036887	0.00017411	0.00617213	0.00064973	0.00015601	0.00016462	0.00110341	0.00256385	0.00148876	0.00195088	0.00301484	0.00125141	0.0185454	0.00067273	0.00408905	0.00397242	0.00032254	0.00090496	0.00771089	0.00157828	0.0181534	4.359e-05	0.0227538	0.00123801	0.00261578	0.00096437	0.00178264
Health_5_3_1	1	0.00234328	0.00182516	0.00391425	0.00012053	0.00708863	0.00365495	0.0724774	0.0220239	0.00072452	0.00341209	0.00131644	1.261e-05	8.81e-05	0.00451811	0.00039727	4.799e-05	0.00237129	0.00144726	0.00067612	0.00923629	0.00034415	0.00023939	0.00526367	0.00064317	0.00033472	0.00021716	0.00121356	0.00311002	0.00164407	0.00224273	0.00279146	0.00117635	0.016372	0.00069191	0.00316318	0.00395154	0.00042446	0.00088427	0.0090048	0.00155375	0.0187011	0.00026261	0.0133847	0.00150285	0.00237758	0.00084424	0.00163299
health_3_3_1	1	0.00225636	0.00131651	0.00294036	0.00027239	0.00690372	0.00295381	0.0670417	0.0212603	0.00063935	0.0040232	0.00159705	7.59e-06	0.00010084	0.00430556	0.00067651	0.00015757	0.00315254	0.00129467	0.00061454	0.00951689	0.00034316	0.00020144	0.00736331	0.00060586	0.00020347	0.00037328	0.00135376	0.00415123	0.00194341	0.00309751	0.00278863	0.00076479	0.015927	0.00074168	0.00322153	0.00420918	0.00032169	0.00084696	0.00850558	0.00116722	0.0170077	0.00039077	0.0145508	0.00167392	0.00270857	0.0010652	0.00164165
health_6_3_1	1	0.00223219	0.00186975	0.00372042	8.518e-05	0.0077332	0.00331908	0.0702756	0.0231704	0.00053734	0.00396699	0.0014407	-2e-07	6.925e-05	0.00619785	7.506e-05	3.524e-05	0.0026567	0.00129212	0.00058707	0.0111164	0.00033719	0.00015006	0.00638327	0.00052148	0.00021162	0.00037311	0.00136848	0.00285035	0.00157688	0.0022792	0.00282692	0.00079844	0.0199308	0.00057982	0.00320939	0.00401553	0.00036553	0.0008882	0.0074997	0.00137629	0.0202097	0.00012111	0.0172936	0.0019863	0.00252745	0.00091714	0.00110064
3ppb_1_3_1	2	0.00192177	0.00127628	0.00290757	0.00022957	0.00614504	0.00326803	0.0682322	0.0230622	0.00094874	0.00396222	0.00157506	2.247e-05	7.878e-05	0.00626453	0.00071868	9.135e-05	0.00245018	0.00194479	0.00096809	0.00898598	0.0002369	0.00021445	0.00647316	0.00089691	0.00035769	0.00029308	0.00136613	0.00373825	0.00200261	0.00262561	0.0028913	0.00106393	0.0297828	0.00089296	0.00234037	0.00345883	0.00038784	0.00072358	0.00872209	0.0013806	0.0185129	0.00045522	0.00789561	0.00150353	0.00262603	0.00070677	0.0019317
3ppb_2_3_1	2	0.00232681	0.00177705	0.00324404	0.00027334	0.00609902	0.00373303	0.0695361	0.0256514	0.00104444	0.00423504	0.0017354	2.093e-05	7.655e-05	0.00526654	0.0008375	8.505e-05	0.00254687	0.00145042	0.00082493	0.00917382	0.00034331	0.00026327	0.00647109	0.00074173	0.00023196	0.00028547	0.00132128	0.00338268	0.00170876	0.00250141	0.00274041	0.00108917	0.0144301	0.00078757	0.00291354	0.0043656	0.00036203	0.00064494	0.00965266	0.00135358	0.0182855	0.00043616	0.0124231	0.00133076	0.00258585	0.0005585	0.00247012
3ppb_3_3_1	2	0.00257675	0.00317366	0.00474875	9.9e-05	0.00729167	0.00273871	0.0694478	0.0190831	0.00061527	0.00443475	0.00151627	8.7e-06	0.00012114	0.00427366	0.00043764	9.09e-05	0.00268589	0.00137026	0.0006433	0.0113456	0.00036118	0.00020856	0.00579607	0.00057249	0.0003622	0.00020989	0.00116454	0.00334844	0.00134701	0.00247115	0.00312902	0.00111043	0.013416	0.00065701	0.00370889	0.0044938	0.00048658	0.00100291	0.0076905	0.00126249	0.0172454	0.0002295	0.0195219	0.00183665	0.00274467	0.00104379	0.00159877
3ppb_4_3_1	2	0.00169377	0.00145517	0.003463	0.00019785	0.0065472	0.00281855	0.0730275	0.0197539	0.00077241	0.0039939	0.00150579	9.54e-06	0.00016072	0.00394096	0.00031812	9.406e-05	0.00276077	0.00152757	0.00061463	0.0102069	0.00039977	0.00020597	0.00709613	0.0006233	0.00020273	0.0003352	0.00151968	0.00341078	0.00139826	0.00238326	0.00277083	0.00061276	0.0147247	0.00073388	0.00302423	0.00335191	0.00038101	0.00081896	0.00710971	0.00108158	0.0183421	0.00033094	0.0111765	0.00148899	0.00256677	0.00101419	0.00173987
3ppb_5_3_1	2	0.00200083	0.00163322	0.00385605	0.00018477	0.00703103	0.00563366	0.0652426	0.0248115	0.00102207	0.00465733	0.00197494	1.54e-05	9.371e-05	0.00657782	0.00076195	8.107e-05	0.00249742	0.00163944	0.00097197	0.0108919	0.00037243	0.00027102	0.00682627	0.00074381	0.00025748	0.00023004	0.00144257	0.00329931	0.00169128	0.00260901	0.00319474	0.00105081	0.012709	0.00083266	0.00302436	0.00449658	0.00044345	0.00066792	0.00886239	0.00134622	0.0180631	0.00036534	0.0120462	0.00212619	0.00279462	0.0006236	0.00224859
3ppb_6_3_1	2	0.00279524	0.00199196	0.00397488	0.00015971	0.00748516	0.00357946	0.0628621	0.0228407	0.00108098	0.00513965	0.00224397	1.509e-05	0.00010883	0.00604767	0.00071452	1.486e-05	0.00249515	0.00191009	0.00085647	0.010881	0.00037936	0.00024299	0.00706694	0.00071127	0.00025134	0.00028286	0.00102956	0.00372843	0.00228045	0.00291788	0.00363437	0.00121342	0.0111876	0.00080406	0.00330135	0.00488538	0.00051529	0.00070636	0.00940025	0.00137887	0.016371	0.00026683	0.0210403	0.00216137	0.00348117	0.00051155	0.00216338
10ppb_1_3_1	3	0.00218676	0.0020029	0.0037293	0.00018979	0.00694268	0.00371388	0.0689342	0.0250385	0.00094869	0.00456649	0.00166084	8.21e-06	6.153e-05	0.00445614	0.0004756	8.633e-05	0.00259882	0.00158171	0.00064017	0.00973448	0.00034858	0.00023032	0.00660207	0.00067099	0.00032736	0.00027729	0.00138476	0.00476627	0.00154892	0.00222534	0.00272919	0.00086231	0.0138156	0.00074236	0.00335823	0.00430389	0.00041692	0.00082706	0.00800463	0.00163751	0.0186074	0.0003209	0.0117696	0.00149438	0.00258616	0.00092432	0.00216493
10ppb_2_3_1	3	0.0018984	0.00135151	0.00298996	0.00016884	0.0063172	0.00379954	0.0716468	0.0233866	0.00103549	0.0039618	0.0016363	9.46e-06	6.124e-05	0.00483193	0.00051173	8.003e-05	0.00238273	0.00167007	0.00082865	0.00890792	0.00028145	0.00020099	0.00647906	0.00071193	0.00022121	0.00036431	0.00141205	0.00297314	0.0019202	0.00224814	0.00269337	0.00093768	0.0171813	0.00082151	0.00265555	0.00339649	0.00032857	0.00080118	0.00784946	0.00126475	0.0197169	0.00027425	0.00877727	0.00141058	0.00241204	0.00071436	0.00232771
10ppb_3_3_1	3	0.0021343	0.00168073	0.00338029	9.106e-05	0.00731886	0.00508263	0.0594894	0.0263499	0.0010523	0.00477623	0.00187315	3.06e-06	6.876e-05	0.00548828	0.00033944	5.612e-05	0.0024995	0.00159887	0.00098105	0.00938161	0.00030269	0.00017337	0.00697748	0.00076557	0.00020184	0.00019985	0.00120813	0.00406895	0.00214998	0.00272604	0.00324211	0.00081302	0.0167865	0.00087982	0.00279742	0.00421428	0.00043298	0.00071668	0.0137757	0.00143276	0.0174556	0.00018119	0.0166396	0.00186938	0.00302966	0.00078437	0.00204339
10ppb_4_3_1	3	0.00227619	0.00265339	0.0042949	8.285e-05	0.00619656	0.00444404	0.0744145	0.0296464	0.00093631	0.00419808	0.00158816	5.84e-06	5.993e-05	0.00644144	0.0004213	4.969e-05	0.00248563	0.00112721	0.00082098	0.00950689	0.00036384	0.00019707	0.00593174	0.00066233	0.00023139	0.0002868	0.0012316	0.00225351	0.0013211	0.00166226	0.00249072	0.00118136	0.0143048	0.00066779	0.00318381	0.00473993	0.0003034	0.00077149	0.010144	0.00122521	0.0206069	0.0001339	0.0134953	0.00128483	0.0019766	0.00064733	0.00220962
10ppb_5_3_1	3	0.00288193	0.00241705	0.00426333	0.00015699	0.00710398	0.00416751	0.0627844	0.0232458	0.00095688	0.00495624	0.00203914	1.454e-05	9.922e-05	0.00571014	0.00064842	7.208e-05	0.00250918	0.00142605	0.00076955	0.00966136	0.00046288	0.00029742	0.00578843	0.0006639	0.00026946	0.00027067	0.00136615	0.00445729	0.00165113	0.00323164	0.00306636	0.0012965	0.0154042	0.00071987	0.00308412	0.00462059	0.0004908	0.00079496	0.00850939	0.00128988	0.0186918	0.00032533	0.0191571	0.00246791	0.00274421	0.00078262	0.0017584
10ppb_6_3_1	3	0.00204012	0.0018049	0.00269529	0.00015647	0.0061065	0.00560054	0.063281	0.0374958	0.00094873	0.00389763	0.00144482	1.499e-05	0.00012822	0.00671562	0.00062381	8.41e-05	0.00261201	0.00159652	0.0007152	0.00811698	0.00037476	0.00027011	0.00530559	0.00085782	0.00019388	0.00023717	0.00130734	0.00414314	0.00195531	0.00235584	0.00283973	0.00117992	0.0109477	0.00078146	0.0027589	0.00473247	0.00044704	0.00082299	0.0111437	0.00122765	0.0185661	0.0003362	0.0080308	0.00113908	0.00248533	0.00103433	0.00209545
30ppb_1_3_1	4	0.0022341	0.001695	0.00338457	9.723e-05	0.00596898	0.00344357	0.0723476	0.0245082	0.00072975	0.0035619	0.00131197	7.87e-06	0.00011121	0.00537703	0.00048361	7.19e-05	0.0028461	0.00152002	0.00053386	0.0100706	0.00030343	0.00018649	0.00609403	0.00055028	0.00030708	0.00023133	0.00108634	0.00249907	0.0015705	0.00184302	0.00252073	0.0010987	0.0151807	0.00059399	0.00370801	0.00488973	0.00031646	0.00080971	0.0093019	0.00118645	0.0190125	0.00017654	0.0150602	0.00094145	0.00204387	0.0008334	0.00174651
30ppb_2_3_1	4	0.0020087	0.00132087	0.00278545	9.353e-05	0.00602767	0.00430674	0.0682096	0.0242153	0.00079224	0.00390241	0.00159848	2.76e-06	0.00012655	0.00505234	0.00072434	9.171e-05	0.00259738	0.00141952	0.00058564	0.00963604	0.00030513	0.00020839	0.00609196	0.00054697	0.00018938	0.00026457	0.00127155	0.00322035	0.00189166	0.00246596	0.00284152	0.00091891	0.0239322	0.00061728	0.003321	0.00430829	0.00042356	0.00082754	0.00995199	0.00104796	0.0191309	0.00018172	0.013874	0.00184955	0.00239531	0.00091339	0.00194365
30ppb_3_3_1	4	0.00260446	0.00177343	0.00330375	0.00019977	0.00648057	0.00388735	0.0666327	0.0223348	0.00119618	0.00474731	0.0020427	2.864e-05	0.00011464	0.0055534	0.00091708	7.684e-05	0.00252126	0.0019868	0.00082511	0.00860564	0.00027682	0.00027775	0.00611476	0.0008692	0.00044503	0.00029272	0.00117779	0.00413323	0.00185112	0.00271646	0.00311805	0.00127548	0.0193318	0.00082182	0.00291343	0.00449213	0.00044114	0.00065982	0.00926736	0.00146958	0.0165982	0.00046797	0.0134035	0.0010941	0.00275455	0.00047925	0.00227712
30ppb_4_3_1	4	0.00195247	0.00127698	0.00301677	0.00015575	0.0071957	0.00317019	0.0671603	0.0220519	0.00089582	0.00429036	0.00171176	6.97e-06	0.00012181	0.00381245	0.00041921	5.093e-05	0.00306319	0.0017534	0.00056952	0.0107546	0.00034991	0.00019498	0.00775737	0.00073628	0.00017878	0.00029843	0.00132313	0.00325997	0.00198737	0.0027626	0.00310484	0.00069889	0.0176724	0.00078795	0.00335747	0.00366582	0.00038875	0.00084521	0.00744498	0.00108561	0.0175865	0.00024275	0.0126595	0.00132681	0.00306199	0.0009614	0.00183502
30ppb_5_3_1	4	0.00193412	0.00157127	0.00285353	0.00014089	0.00631806	0.00374096	0.0689309	0.0225393	0.00092192	0.00433498	0.00163041	1.281e-05	0.00016091	0.00424618	0.00069725	7.735e-05	0.00261493	0.00172895	0.00066742	0.0085359	0.00030718	0.00023203	0.00656699	0.00071537	0.00023887	0.00026375	0.00145544	0.00385322	0.00241841	0.00289865	0.00321345	0.00104172	0.0122403	0.00080864	0.00288918	0.00436323	0.00047112	0.00071649	0.008313	0.0011032	0.0180396	0.00024696	0.0105584	0.00144549	0.00282962	0.0008348	0.00195384
30ppb_6_3_1	4	0.00218953	0.00152577	0.00315843	0.00026206	0.00677457	0.00477906	0.0651469	0.0267298	0.00113712	0.00437887	0.0020132	2.124e-05	0.00011347	0.0105189	0.00073796	0.00010887	0.00295499	0.00164787	0.00080748	0.00971739	0.00032898	0.00025652	0.00697561	0.00086307	0.00022186	0.00037455	0.00119124	0.00297256	0.00178553	0.00235965	0.00288137	0.00105499	0.0203318	0.00084872	0.00302788	0.00479145	0.00026975	0.00066433	0.0102609	0.00106245	0.0164346	0.00041549	0.0111944	0.00088826	0.00256632	0.00065425	0.00207704
50ppb_1_3_1	5	0.00171847	0.00151105	0.0032184	8.17e-05	0.00617924	0.00328216	0.0693923	0.0228047	0.0008016	0.00357493	0.00122777	2.24e-06	9.878e-05	0.00436911	6.611e-05	2.398e-05	0.00289652	0.00169761	0.00079082	0.010304	0.00038294	0.00019424	0.00687784	0.00064254	0.00019977	0.00021865	0.00120185	0.00263784	0.00122089	0.00220047	0.0026648	0.0007022	0.021296	0.00080521	0.00354744	0.00402825	0.00037	0.00083235	0.0076063	0.00120187	0.0207603	0.00018425	0.0119946	0.00161594	0.0023473	0.00098436	0.00197401
50ppb_2_3_1	5	0.002317	0.00157403	0.00283797	6.137e-05	0.00596353	0.00377023	0.0646287	0.0243502	0.00105094	0.00460706	0.00191312	5.49e-06	0.0002184	0.00974861	0.00076462	2.047e-05	0.00309319	0.00187497	0.00078297	0.00948578	0.00032454	0.00020995	0.00696871	0.00085961	0.0001817	0.00021862	0.00103054	0.00368744	0.00216542	0.00250951	0.00304531	0.00128003	0.0137751	0.00079432	0.00347174	0.00537126	0.00037811	0.00067939	0.00953276	0.00158233	0.0165484	0.00013837	0.0142996	0.00139628	0.00269288	0.00119026	0.00233913
50ppb_3_3_1	5	0.00221987	0.00180852	0.00318497	0.0002881	0.0065804	0.00403655	0.0626554	0.023421	0.00110161	0.00414455	0.00178769	2.735e-05	0.0001797	0.00508769	0.0010745	0.00025917	0.00309941	0.00140003	0.00080187	0.00977317	0.00036227	0.00032716	0.00652405	0.00083214	0.0003703	0.00047926	0.00176384	0.00319335	0.00192804	0.0023199	0.00311041	0.00109733	0.0115652	0.00086534	0.00346989	0.00482595	0.00043386	0.0007988	0.00851042	0.0014074	0.0167872	0.00048429	0.0161873	0.00158548	0.00266308	0.00096174	0.00225802
50ppb_4_3_1	5	0.00206337	0.00152281	0.00322116	0.00019479	0.00695279	0.00250976	0.0679865	0.0179168	0.00084269	0.00376208	0.0013497	-3.72e-06	0.00011296	0.0017315	0.00060685	-1.308e-05	0.00287123	0.00167869	0.00070955	0.0105161	0.0004269	0.00015731	0.00738485	0.0008475	9.977e-05	0.00018122	0.00115613	0.00373354	0.00206193	0.00287666	0.00313863	0.00062419	0.0191729	0.00085199	0.00343391	0.00304935	0.0003263	0.00099461	0.00416063	0.00126621	0.0173384	0.00012622	0.012863	0.00123482	0.00328626	0.00118004	0.00175394
50ppb_5_3_1	5	0.00201495	0.00118897	0.00304417	0.00020462	0.00613271	0.00254189	0.0731452	0.018385	0.00073072	0.00332964	0.00132257	5.01e-06	0.00019968	0.00347271	0.00030539	6.39e-05	0.00287528	0.001594	0.0006188	0.00998192	0.00039507	0.00020123	0.00693913	0.00065152	0.00016857	0.00029612	0.00137656	0.00293582	0.0014921	0.00257037	0.00259023	0.00060688	0.0157042	0.00073508	0.00313604	0.00366753	0.00032639	0.0008036	0.006875	0.00102764	0.017877	0.0002883	0.0147627	0.00115692	0.00251787	0.00105953	0.00168288
50ppb_6_3_1	5	0.00260952	0.00200189	0.00312511	0.00018983	0.00633251	0.00492426	0.0642402	0.0238402	0.00090811	0.00458899	0.0018725	1.856e-05	0.00018659	0.00645856	0.00074363	0.00012609	0.00251755	0.00158019	0.00079244	0.00896159	0.00047344	0.00030016	0.00576335	0.00067697	0.00028232	0.00044228	0.00156285	0.00441011	0.00189338	0.00302392	0.00313944	0.00113386	0.0110151	0.0006422	0.00311162	0.00487352	0.00053914	0.00082856	0.00984564	0.0011344	0.0163474	0.00040206	0.0182983	0.0020696	0.00271545	0.00082173	0.00180735
70ppb_1_3_1	6	0.00197722	0.00188199	0.00400141	0.00028408	0.00676981	0.00384889	0.0661582	0.0222985	0.00105934	0.00473842	0.00177293	2.653e-05	0.00013352	0.00744183	0.00093193	0.00014282	0.00201392	0.001721	0.00098329	0.00945898	0.00029147	0.0002447	0.0060174	0.00090399	0.00038908	0.00037269	0.0013938	0.00407511	0.00171956	0.00298275	0.00319732	0.00107502	0.0125041	0.00095535	0.00225136	0.00392112	0.00044171	0.00058017	0.00883301	0.00121399	0.0170737	0.00048786	0.0132444	0.00167416	0.00286352	0.00062182	0.0018345
70ppb_2_3_1	6	0.00255283	0.00176626	0.00344369	0.00014423	0.00703585	0.00302878	0.06071	0.0198525	0.00084873	0.0046302	0.00199978	7.79e-06	0.00018344	0.00534756	0.00070619	0.00011309	0.00285052	0.0016674	0.00092848	0.0111174	0.00036811	0.00023539	0.00706039	0.00066889	0.00021222	0.00024398	0.00131313	0.00398385	0.00247656	0.00299831	0.00366495	0.00099222	0.012257	0.00079325	0.00336172	0.00471563	0.00053735	0.00091447	0.00873144	0.0013305	0.0159755	0.00027088	0.0214182	0.00245921	0.0032754	0.00106832	0.00217361
70ppb_3_3_1	6	0.00179769	0.00119934	0.00243754	0.00021504	0.00553853	0.0042289	0.0685252	0.0255539	0.00080143	0.00348265	0.0013076	1.368e-05	0.00011478	0.00374154	0.00055219	9.171e-05	0.00246954	0.00158859	0.00084638	0.00796052	0.00024815	0.0001903	0.00603081	0.00077673	0.00019425	0.00033903	0.00124715	0.00326907	0.00158995	0.00242496	0.0027658	0.00073177	0.0505883	0.00083993	0.00243552	0.00370866	0.00029307	0.00077598	0.00907187	0.00109245	0.0165169	0.00036045	0.00699607	0.00109929	0.00231562	0.00080465	0.00205381
70ppb_4_3_1	6	0.00207631	0.00161514	0.00300172	0.00019152	0.00590982	0.00415397	0.0669717	0.030527	0.00095065	0.0040225	0.00150336	1.493e-05	0.00011036	0.00798602	0.0007729	8.25e-05	0.00200371	0.00204722	0.00075891	0.0070196	0.00033089	0.00027236	0.00574139	0.00091184	0.00028506	0.00024402	0.00140195	0.00480174	0.00214329	0.00309727	0.00298468	0.00093703	0.0160149	0.00083445	0.0019499	0.00388864	0.00046893	0.00060404	0.0084146	0.00131082	0.0177147	0.00038816	0.00954194	0.00112588	0.00263616	0.00070172	0.00220983
70ppb_5_3_1	6	0.00219618	0.00154233	0.00313543	0.0001714	0.00612513	0.003466	0.0666686	0.0281228	0.00095571	0.00462303	0.00188561	1.333e-05	0.00023963	0.0065913	0.00065519	8.3e-05	0.00254869	0.0017734	0.00071452	0.00981612	0.00041672	0.00025989	0.0067475	0.00083305	0.00030408	0.00027169	0.00143546	0.00395308	0.00192228	0.00253731	0.00290232	0.00098814	0.0186358	0.00073811	0.00282307	0.00457337	0.00046138	0.00071009	0.00788635	0.00144704	0.0173168	0.00034773	0.0154991	0.00184445	0.00275433	0.0009177	0.00201956
70ppb_6_3_1	6	0.00213896	0.00160406	0.00286719	0.00021075	0.00591025	0.00380274	0.0653777	0.0249873	0.00102926	0.00456823	0.00193031	1.741e-05	0.00012282	0.00563803	0.00079761	6.283e-05	0.00242491	0.00194271	0.00081731	0.00861237	0.00029782	0.00024135	0.00611048	0.00069711	0.00023908	0.0002605	0.00131655	0.00373477	0.00204512	0.00282938	0.00306345	0.0010081	0.0417276	0.00069215	0.00254891	0.00459824	0.00043849	0.00067788	0.00996791	0.00116085	0.0169485	0.00031706	0.0096505	0.00206283	0.00270323	0.00051523	0.0025385
90ppb_1_3_1	7	0.00159452	0.00108234	0.00243032	0.00028628	0.0055989	0.00330435	0.0723889	0.0265108	0.00058365	0.00264972	0.00063729	6.62e-06	6.126e-05	0.00366732	0.00034348	4.203e-05	0.00246785	0.00199717	0.0008686	0.00886138	0.00025483	0.00013374	0.00645408	0.00083657	0.0002449	0.00026911	0.00141215	0.0038908	0.00190217	0.00270593	0.00231816	0.00065773	0.0349161	0.00077189	0.00247687	0.00289977	0.00025934	0.00077801	0.0103576	0.00131154	0.0201233	0.00037094	0.00754	0.00084496	0.00253858	0.00086181	0.00208893
90ppb_2_3_1	7	0.0021064	0.00138935	0.00301565	0.00016693	0.00612704	0.00380861	0.066561	0.031219	0.00117345	0.00432951	0.00191887	1.006e-05	7.311e-05	0.00714209	0.00133567	0.0001128	0.00226251	0.00164446	0.00111368	0.0084668	0.00029827	0.00020055	0.00680639	0.00092658	0.00021343	0.00029394	0.00138392	0.00304395	0.00255551	0.00232031	0.00307796	0.0012224	0.0170913	0.00089135	0.00261411	0.00449609	0.00033315	0.00066859	0.00865392	0.00131756	0.0181063	0.00024059	0.0106807	0.00153773	0.00259027	0.00065766	0.00278101
90ppb_3_3_1	7	0.00219355	0.00146372	0.00286444	0.00035288	0.00645031	0.00457739	0.0639868	0.0225684	0.00112159	0.00445906	0.00200448	2.378e-05	9.563e-05	0.00495104	0.00106052	0.00013628	0.00217289	0.0020271	0.00101404	0.00739404	0.0002942	0.00026188	0.00673856	0.00102113	0.00029708	0.00035375	0.00157622	0.0037518	0.00238927	0.00293121	0.00335318	0.00123205	0.0303746	0.00104512	0.00217469	0.00385868	0.00034071	0.00053211	0.00977433	0.00114226	0.0144703	0.00055918	0.0104548	0.00128434	0.00277545	0.00051519	0.00285237
90ppb_4_3_1	7	0.00142065	0.00132782	0.00289936	0.00031672	0.00604698	0.00332206	0.072224	0.0208465	0.00065776	0.00353291	0.00120356	3.11e-05	0.00016088	0.00285604	0.00030857	0.00018955	0.00215047	0.0016142	0.00074333	0.00785419	0.00035514	0.00033126	0.00642304	0.00068832	0.00035904	0.0004152	0.00180519	0.00362255	0.00191834	0.00286415	0.00310718	0.00081067	0.0205912	0.00078496	0.00231582	0.00350857	0.00052925	0.00073795	0.00701782	0.00097669	0.0186533	0.00052512	0.00705918	0.00135847	0.00277074	0.00082045	0.00203126
90ppb_5_3_1	7	0.00247256	0.00218023	0.00383272	0.00010808	0.00743372	0.00299818	0.0616032	0.0202433	0.00075942	0.00489512	0.00197223	6.36e-06	0.00014246	0.00541162	0.00038126	7.49e-05	0.00271466	0.00191283	0.00049046	0.0107932	0.00034712	0.00018816	0.00763329	0.00061898	0.00020377	0.00016941	0.00119425	0.00357122	0.00221107	0.00286277	0.00373372	0.00101723	0.0175127	0.00073861	0.0033252	0.00481924	0.00056568	0.00089396	0.00761515	0.00128553	0.016824	0.0002054	0.0197199	0.0030038	0.00346596	0.00116242	0.00196476
90ppb_6_3_1	7	0.00210541	0.00153451	0.00354373	0.00016617	0.00577098	0.00391772	0.0707266	0.0296078	0.00093705	0.00424266	0.00180039	1.397e-05	0.0001191	0.00851928	0.00058509	7.175e-05	0.00253211	0.00175191	0.00099577	0.0092893	0.00038638	0.00022949	0.0069087	0.00071335	0.00025852	0.00030379	0.00146257	0.00279206	0.0019889	0.00215577	0.00286757	0.00106333	0.0124958	0.00073902	0.00288643	0.00455112	0.00036974	0.00070537	0.0100396	0.00107222	0.0187737	0.00026164	0.0121149	0.00192163	0.00223661	0.00068131	0.00249124
