# Supplementary material for: An NMR-based metabolomics study on sea anemones Exaiptasia diaphana ( Rapp, 1829 ) with atrazine exposure
Source: Royal Society of Chemistry journal article supplement (doi:10.1039/d1mo00223f), 2021-09-20
Supplement: d1mo00223f2.pdf [file d1mo00223f2.pdf]

**Table S1 The physical behavioral observations of *E. diaphana* after two weeks compared to the control group.**

| Physical and Behavioral Observations | 3 ppb      | 10 ppb              | 30 ppb     | 50 ppb                | 70 ppb                | 90 ppb                   |
|--------------------------------------|------------|---------------------|------------|-----------------------|-----------------------|--------------------------|
| Bleaching                            | No         | No                  | No         | Slight                | Slight                | Slight                   |
| Tentacles                            | Negligible | Slightly disheveled | Disheveled | Disheveled            | Disheveled            | Significantly disheveled |
| Sluggish Reactions                   | Negligible | Slightly reduced    | Reduced    | Significantly reduced | Significantly reduced | Significantly reduced    |

**Table S2 The metabolites with p values and fold change under various concentrations of atrazine treatment. Fold Change (FC)**

| Metabolites     | 3 ppb vs control |             | 10 ppb vs control |             | 30 ppb vs control |             | 50 ppb vs control |             | 70 ppb vs control |             | 90 ppb vs control |             |
|-----------------|------------------|-------------|-------------------|-------------|-------------------|-------------|-------------------|-------------|-------------------|-------------|-------------------|-------------|
|                 | p values         | Fold Change | p values          | Fold Change | p values          | Fold Change | p values          | Fold Change | p values          | Fold Change | p values          | Fold Change |
| 2-Oxocaproate   | 3.92E-01         | 0.93        | 3.89E-01          | 0.94        | 1.50E-01          | 0.90        | 1.95E-01          | 0.91        | 1.10E-01          | 0.89        | 7.16E-02          | 0.83        |
| 4-Aminobutyrate | 4.88E-01         | 1.15        | 1.92E-01          | 1.21        | 5.60E-01          | 0.93        | 8.69E-01          | 0.98        | 8.87E-01          | 0.98        | 4.62E-01          | 0.91        |
| Acetate         | 7.80E-01         | 1.03        | 8.86E-01          | 0.99        | 5.74E-02          | 0.86        | 5.46E-02          | 0.87        | 1.71E-01          | 0.88        | 1.25E-01          | 0.86        |
| Adenosine       | 1.99E-01         | 1.34        | 7.87E-01          | 0.99        | 5.65E-01          | 1.11        | 6.12E-01          | 1.19        | 9.60E-02          | 1.42        | 1.04E-01          | 1.63        |
| Alanine         | 1.83E-01         | 0.94        | 8.54E-02          | 0.93        | 1.82E-02          | 0.90        | 4.23E-03          | 0.88        | 7.75E-03          | 0.86        | 1.29E-02          | 0.87        |
| Aspartate       | 5.97E-01         | 0.94        | 1.87E-01          | 1.16        | 8.82E-01          | 1.01        | 4.59E-01          | 0.91        | 8.75E-01          | 0.97        | 6.69E-01          | 0.95        |
| Betaine         | 4.16E-01         | 0.98        | 2.86E-01          | 0.96        | 3.15E-01          | 0.98        | 1.96E-01          | 0.96        | 2.50E-02          | 0.95        | 4.48E-01          | 0.98        |
| Choline         | 6.81E-01         | 0.97        | 1.04E-01          | 1.18        | 6.79E-01          | 1.02        | 4.09E-01          | 0.94        | 3.56E-01          | 1.09        | 4.45E-01          | 1.08        |

|                  |          |      |          |      |          |      |          |      |          |      |          |      |
|------------------|----------|------|----------|------|----------|------|----------|------|----------|------|----------|------|
| Citrate          | 1.92E-01 | 1.19 | 1.71E-02 | 1.28 | 1.04E-01 | 1.24 | 1.41E-01 | 1.18 | 5.29E-02 | 1.23 | 4.46E-01 | 1.14 |
| Creatine         | 6.79E-02 | 1.11 | 7.48E-02 | 1.11 | 2.80E-01 | 1.06 | 9.06E-01 | 1.01 | 1.53E-01 | 1.10 | 9.98E-01 | 1.02 |
| Creatinine       | 1.40E-01 | 1.14 | 1.57E-01 | 1.11 | 2.25E-01 | 1.12 | 8.87E-01 | 1.03 | 1.95E-01 | 1.13 | 8.57E-01 | 1.03 |
| Cytidine         | 1.11E-01 | 2.33 | 2.46E-01 | 1.42 | 1.92E-01 | 2.03 | 8.72E-01 | 1.39 | 1.09E-01 | 2.37 | 1.38E-01 | 2.32 |
| dCTP             | 2.13E-01 | 1.25 | 6.38E-01 | 0.93 | 1.09E-02 | 1.46 | 4.15E-03 | 1.94 | 8.54E-03 | 1.76 | 2.96E-01 | 1.27 |
| Dimethyl sulfone | 8.97E-01 | 1.02 | 5.22E-01 | 1.06 | 8.09E-01 | 1.09 | 5.68E-01 | 0.98 | 3.39E-01 | 1.16 | 8.75E-01 | 1.03 |
| Ethanol          | 2.58E-01 | 1.36 | 4.93E-01 | 1.09 | 1.80E-01 | 1.43 | 7.93E-01 | 1.28 | 9.28E-02 | 1.59 | 3.71E-01 | 1.44 |
| Formate          | 4.74E-01 | 1.18 | 3.26E-01 | 1.11 | 2.35E-01 | 1.24 | 2.35E-01 | 1.24 | 1.27E-01 | 1.49 | 1.53E-01 | 1.62 |
| Glucose          | 1.17E-01 | 0.91 | 4.87E-02 | 0.89 | 7.96E-01 | 0.98 | 6.03E-01 | 1.03 | 4.39E-02 | 0.85 | 2.04E-02 | 0.85 |
| Glutamate        | 3.26E-02 | 1.18 | 2.90E-01 | 1.08 | 7.47E-03 | 1.21 | 6.85E-03 | 1.18 | 3.70E-04 | 1.29 | 2.55E-04 | 1.32 |
| Glutamine        | 6.62E-02 | 1.22 | 4.15E-02 | 1.19 | 8.87E-01 | 1.00 | 7.31E-02 | 1.12 | 4.75E-03 | 1.26 | 9.52E-02 | 1.31 |
| Glycine          | 5.91E-01 | 1.03 | 1.40E-01 | 0.93 | 4.62E-01 | 0.96 | 8.50E-01 | 0.99 | 1.88E-01 | 0.91 | 7.79E-02 | 0.88 |
| Guanosine        | 8.59E-01 | 1.03 | 6.53E-01 | 1.05 | 6.56E-02 | 0.92 | 3.58E-02 | 1.16 | 5.07E-01 | 0.96 | 4.03E-01 | 0.95 |
| Histidine        | 7.03E-02 | 1.19 | 2.32E-01 | 1.16 | 1.84E-01 | 1.15 | 3.22E-01 | 1.17 | 4.35E-02 | 1.22 | 4.99E-01 | 1.14 |
| Homoserine       | 4.17E-01 | 1.04 | 7.00E-01 | 0.98 | 5.07E-01 | 1.04 | 2.88E-01 | 1.06 | 9.16E-01 | 0.99 | 1.66E-01 | 1.08 |
| Hydroxyacetone   | 3.02E-01 | 1.10 | 1.57E-01 | 1.11 | 4.27E-01 | 1.10 | 1.03E-01 | 1.16 | 2.45E-02 | 1.23 | 6.44E-02 | 1.23 |
| Hypoxanthine     | 8.80E-02 | 1.31 | 3.09E-01 | 1.14 | 2.83E-01 | 1.25 | 9.33E-01 | 1.03 | 1.32E-01 | 1.28 | 1.34E-01 | 1.24 |

|                             |          |      |          |      |          |      |          |      |          |      |          |      |
|-----------------------------|----------|------|----------|------|----------|------|----------|------|----------|------|----------|------|
| IMP                         | 9.20E-01 | 0.98 | 9.45E-01 | 0.98 | 6.74E-01 | 1.03 | 7.41E-01 | 1.10 | 6.74E-01 | 1.03 | 6.48E-01 | 1.08 |
| Inosine                     | 7.90E-01 | 0.98 | 9.19E-01 | 0.99 | 3.63E-01 | 0.94 | 9.86E-01 | 1.01 | 7.20E-01 | 1.02 | 2.14E-01 | 1.11 |
| Isoleucine                  | 7.81E-02 | 1.14 | 1.90E-01 | 1.23 | 4.37E-01 | 1.09 | 2.94E-01 | 1.12 | 1.08E-02 | 1.30 | 1.82E-01 | 1.13 |
| Lactate                     | 8.66E-01 | 1.03 | 7.23E-01 | 1.04 | 1.36E-01 | 1.13 | 6.62E-01 | 1.06 | 8.61E-02 | 1.17 | 5.94E-03 | 1.28 |
| Leucine                     | 1.28E-01 | 1.11 | 8.10E-01 | 1.04 | 4.22E-01 | 1.08 | 1.98E-01 | 1.11 | 2.56E-02 | 1.21 | 1.39E-01 | 1.14 |
| Lysine                      | 1.48E-01 | 1.08 | 1.00E+00 | 1.00 | 3.80E-01 | 1.04 | 3.69E-01 | 1.04 | 7.49E-02 | 1.09 | 3.11E-01 | 1.09 |
| Malate                      | 9.98E-01 | 1.00 | 8.13E-01 | 1.03 | 9.85E-01 | 1.00 | 3.93E-01 | 0.89 | 6.11E-01 | 0.94 | 8.60E-01 | 0.98 |
| Methanol                    | 9.78E-01 | 1.03 | 7.27E-01 | 0.95 | 2.96E-01 | 1.16 | 9.12E-01 | 0.99 | 2.34E-01 | 1.62 | 1.21E-01 | 1.42 |
| Methionine                  | 7.39E-02 | 1.13 | 1.14E-01 | 1.10 | 4.23E-01 | 1.07 | 8.65E-02 | 1.12 | 3.57E-02 | 1.16 | 3.36E-02 | 1.19 |
| myo-Inositol                | 2.56E-01 | 0.92 | 7.97E-02 | 0.89 | 5.37E-01 | 0.96 | 7.84E-01 | 1.01 | 1.13E-02 | 0.77 | 1.04E-02 | 0.79 |
| O-Phosphocholine            | 8.47E-01 | 1.02 | 3.37E-01 | 1.06 | 1.19E-01 | 1.08 | 7.01E-01 | 1.05 | 4.90E-01 | 1.04 | 7.18E-01 | 0.98 |
| Phenylalanine               | 2.97E-02 | 1.21 | 2.19E-01 | 1.13 | 5.20E-01 | 1.08 | 3.13E-01 | 1.11 | 5.79E-02 | 1.24 | 5.32E-01 | 1.12 |
| Serine                      | 3.68E-01 | 0.93 | 5.74E-01 | 0.96 | 2.61E-01 | 0.92 | 9.53E-01 | 1.00 | 1.14E-01 | 0.87 | 1.51E-01 | 0.88 |
| sn-Glycero-3-phosphocholine | 8.39E-01 | 0.99 | 2.87E-01 | 1.14 | 5.33E-01 | 1.05 | 3.15E-01 | 0.89 | 7.73E-01 | 1.01 | 8.13E-01 | 1.02 |
| Succinate                   | 2.03E-01 | 0.92 | 4.75E-01 | 0.95 | 1.57E-02 | 0.82 | 1.82E-01 | 0.90 | 9.28E-02 | 0.89 | 2.56E-02 | 0.84 |
| Taurine                     | 1.53E-01 | 0.95 | 6.68E-01 | 1.01 | 2.05E-01 | 0.95 | 1.91E-01 | 0.94 | 5.58E-03 | 0.91 | 3.62E-01 | 0.95 |
| Thymidine                   | 1.02E-01 | 1.55 | 3.87E-01 | 1.17 | 2.98E-01 | 1.29 | 4.89E-01 | 1.21 | 7.33E-02 | 1.62 | 1.25E-01 | 1.61 |

|                  |          |      |          |      |          |      |          |      |          |      |          |      |
|------------------|----------|------|----------|------|----------|------|----------|------|----------|------|----------|------|
| Trimethylamine   | 1.80E-01 | 0.81 | 8.11E-02 | 0.75 | 1.55E-02 | 0.74 | 1.77E-01 | 0.85 | 8.13E-02 | 0.74 | 2.13E-02 | 0.65 |
| Tyrosine         | 1.66E-01 | 1.20 | 5.36E-01 | 1.11 | 3.38E-01 | 0.87 | 7.27E-01 | 1.04 | 3.92E-01 | 1.18 | 6.89E-01 | 1.15 |
| Valine           | 5.83E-02 | 1.12 | 8.49E-01 | 1.02 | 5.45E-01 | 1.05 | 1.63E-01 | 1.09 | 8.94E-02 | 1.11 | 2.17E-01 | 1.10 |
| Xylose           | 1.82E-01 | 0.85 | 4.13E-01 | 0.93 | 2.91E-01 | 0.89 | 7.74E-02 | 1.18 | 2.55E-01 | 0.88 | 3.07E-01 | 0.89 |
| $\beta$ -Alanine | 8.47E-02 | 1.22 | 2.29E-02 | 1.27 | 7.07E-02 | 1.19 | 1.03E-01 | 1.19 | 1.88E-02 | 1.29 | 7.28E-03 | 1.43 |

**Table S3** The detailed metabolites assignment, the number is corresponding to **Figure S1**.

| Number | Metabolites     | Chemical shift (ppm) | Pattern   | Confidence | notation |
|--------|-----------------|----------------------|-----------|------------|----------|
| 1      | TSP             | 0.00                 | reference | High       |          |
| 2      | Isoleucine      | 0.94                 | triplet   | High       |          |
| 3      | Leucine         | 0.95                 | triplet   | High       |          |
| 4      | Valine          | 0.99                 | doublet   | High       |          |
|        |                 | 1.04                 | doublet   | High       |          |
| 5      | Ethanol         | 1.16                 | triplet   | High       |          |
| 6      | Lactate         | 1.32                 | doublet   | High       |          |
| 7      | Alanine         | 1.47                 | doublet   | High       |          |
| 8      | Lysine          | 1.74                 | multiplet | High       |          |
|        |                 | 3.06                 | triplet   | High       |          |
| 9      | Acetate         | 1.93                 | singlet   | High       |          |
| 10     | Glutamate       | 2.02                 | multiplet | High       |          |
|        |                 | 2.36                 | multiplet | High       |          |
| 11     | Methionine      | 2.17                 | multiplet | High       |          |
|        |                 | 2.65                 | triplet   | High       |          |
| 12     | Hydroxyacetone  | 2.21                 | singlet   | Medium     |          |
|        | Hydroxyacetone  | 4.37                 | singlet   | Medium     |          |
| 13     | 4-Aminobutyrate | 2.30                 | triplet   | High       |          |
| 14     | Succinate       | 2.41                 | singlet   | High       |          |
| 15     | Glutamine       | 2.45                 | multiplet | High       |          |
| 16     | Citrate         | 2.53                 | multiplet | High       |          |
| 17     | Malate          | 2.69                 | doublet   | Medium     | Overlap  |
| 18     | 2-Oxocaproate   | 2.73                 | triplet   | High       |          |

|    |                             |      |           |        |         |
|----|-----------------------------|------|-----------|--------|---------|
| 19 | Aspartate                   | 2.83 | doublet   | High   |         |
| 20 | Trimethylamine              | 2.93 | singlet   | Medium |         |
| 21 | Creatine                    | 3.04 | singlet   | Medium | Overlap |
| 22 | Creatinine                  | 3.06 | singlet   | Medium | Overlap |
| 23 | Dimethyl sulfone            | 3.15 | singlet   | Medium |         |
| 24 | Choline                     | 3.20 | singlet   | Medium |         |
| 25 | O-Phosphocholine            | 3.23 | singlet   | Medium |         |
| 26 | sn-Glycero-3-phosphocholine | 3.24 | singlet   | Medium |         |
| 27 | Betaine                     | 3.27 | singlet   | High   |         |
|    |                             | 3.91 | singlet   | High   |         |
| 28 | Methanol                    | 3.36 | singlet   | High   |         |
| 29 | Taurine                     | 3.42 | triplet   | High   |         |
| 30 | myo-Inositol                | 3.56 | doublet   | Medium |         |
|    |                             | 3.65 | doublet   |        |         |
| 31 | Glycine                     | 3.58 | singlet   | High   |         |
| 32 | Glucose                     | 3.70 | multiplet | High   |         |
|    |                             | 4.65 | doublet   |        |         |
| 33 | Homoserine                  | 3.77 | multiplet | Medium |         |
| 34 | Serine                      | 3.96 | multiplet | High   |         |
| 35 | Adenosine                   | 8.34 | singlet   | Medium |         |
| 36 | Xylose                      | 4.60 | doublet   | High   |         |
| 37 | Cytidine                    | 7.85 | doublet   | Medium |         |
| 38 | Guanosine                   | 5.92 | doublet   | Medium |         |
| 39 | dctp                        | 6.15 | doublet   | Medium |         |
| 40 | Tyrosine                    | 6.93 | multiplet | High   |         |
| 41 | Histidine                   | 7.87 | singlet   | Medium |         |
| 42 | Phenylalanine               | 7.38 | multiplet | High   |         |
| 43 | Thymidine                   | 7.64 | doublet   | High   |         |
| 44 | Hypoxanthine                | 8.21 | singlet   | High   |         |
|    |                             | 8.22 | singlet   |        |         |

|    |                   |      |         |        |  |
|----|-------------------|------|---------|--------|--|
| 45 | Inosine           | 8.26 | singlet | Medium |  |
| 46 | Formate           | 8.46 | singlet | Medium |  |
| 47 | IMP               | 8.56 | singlet | Medium |  |
| 48 | $\beta$ -Alanine* | 2.59 | triplet | Medium |  |

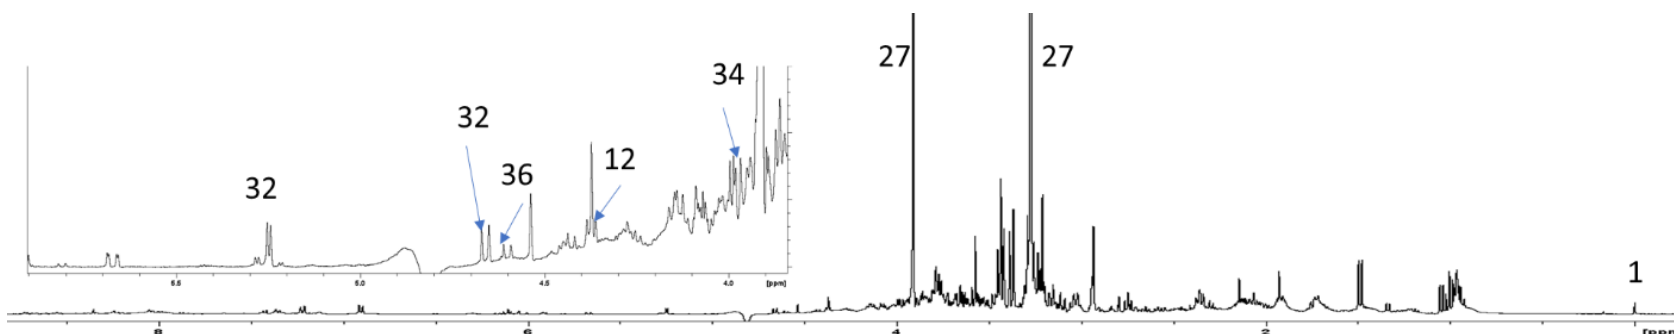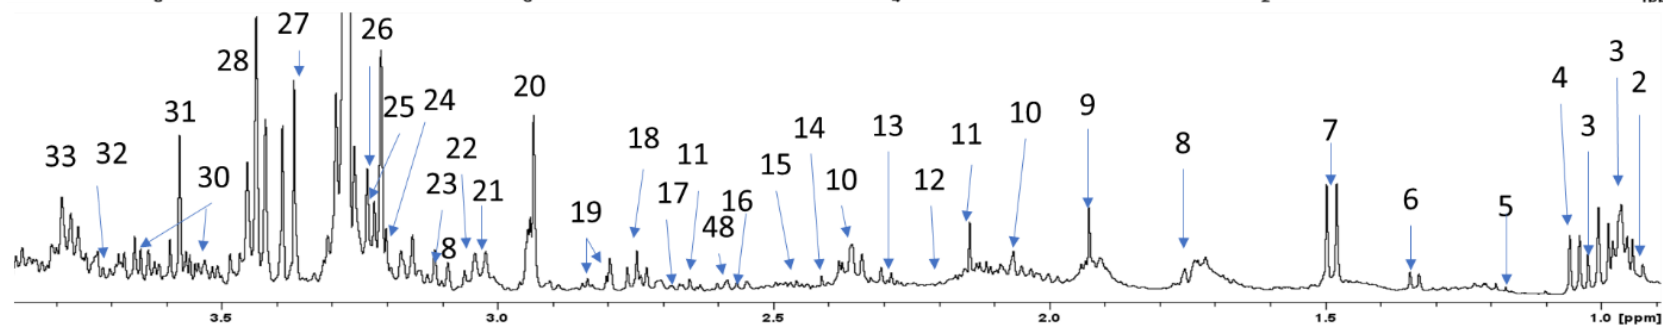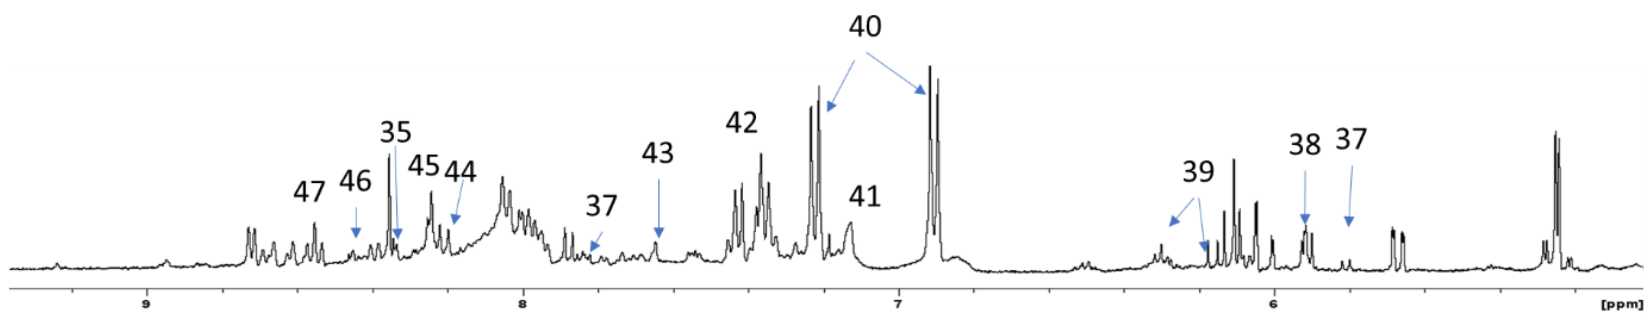

**Figure S1** Representative spectrum of the metabolites.

1,TSP (reference), 2,Isoleucine, 3,Leucine, 4,Valine, 5,Ethanol, 6,Lactate, 7,Alanine, 8,Lysine, 9,Acetate, 10,Glutamate, 11,Methionine, 12,Hydroxyacetone, 13,4-Aminobutyrate, 14,Succinate, 15,Glutamine, 16,Citrate, 17,Malate, 18,2-Oxocaproate, 19,Aspartate, 20,Trimethylamine, 21,Creatine, 22,Creatinine, 23,Dimethyl sulfone, 24,Choline, 25,o-Phosphocholine, 26,sn-Glycero-3-phosphocholine, 27,Betaine, 28,Methanol, 29,Taurine, 30,myo-Inositol, 31,Glycine, 32,Glucose, 33,Homoserine, 34,Serine, 35,Adenosine, 36,Xylose, 37,Cytidine, 38,Guanosine, 39,dctp, 40,Tyrosine, 41,Histidine, 42,Phenylalanine, 43,Thymidine, 44,Hypoxanthine, 45,Inosine, 46,Formate, 47,IMP, 48, $\beta$ -Alanine.



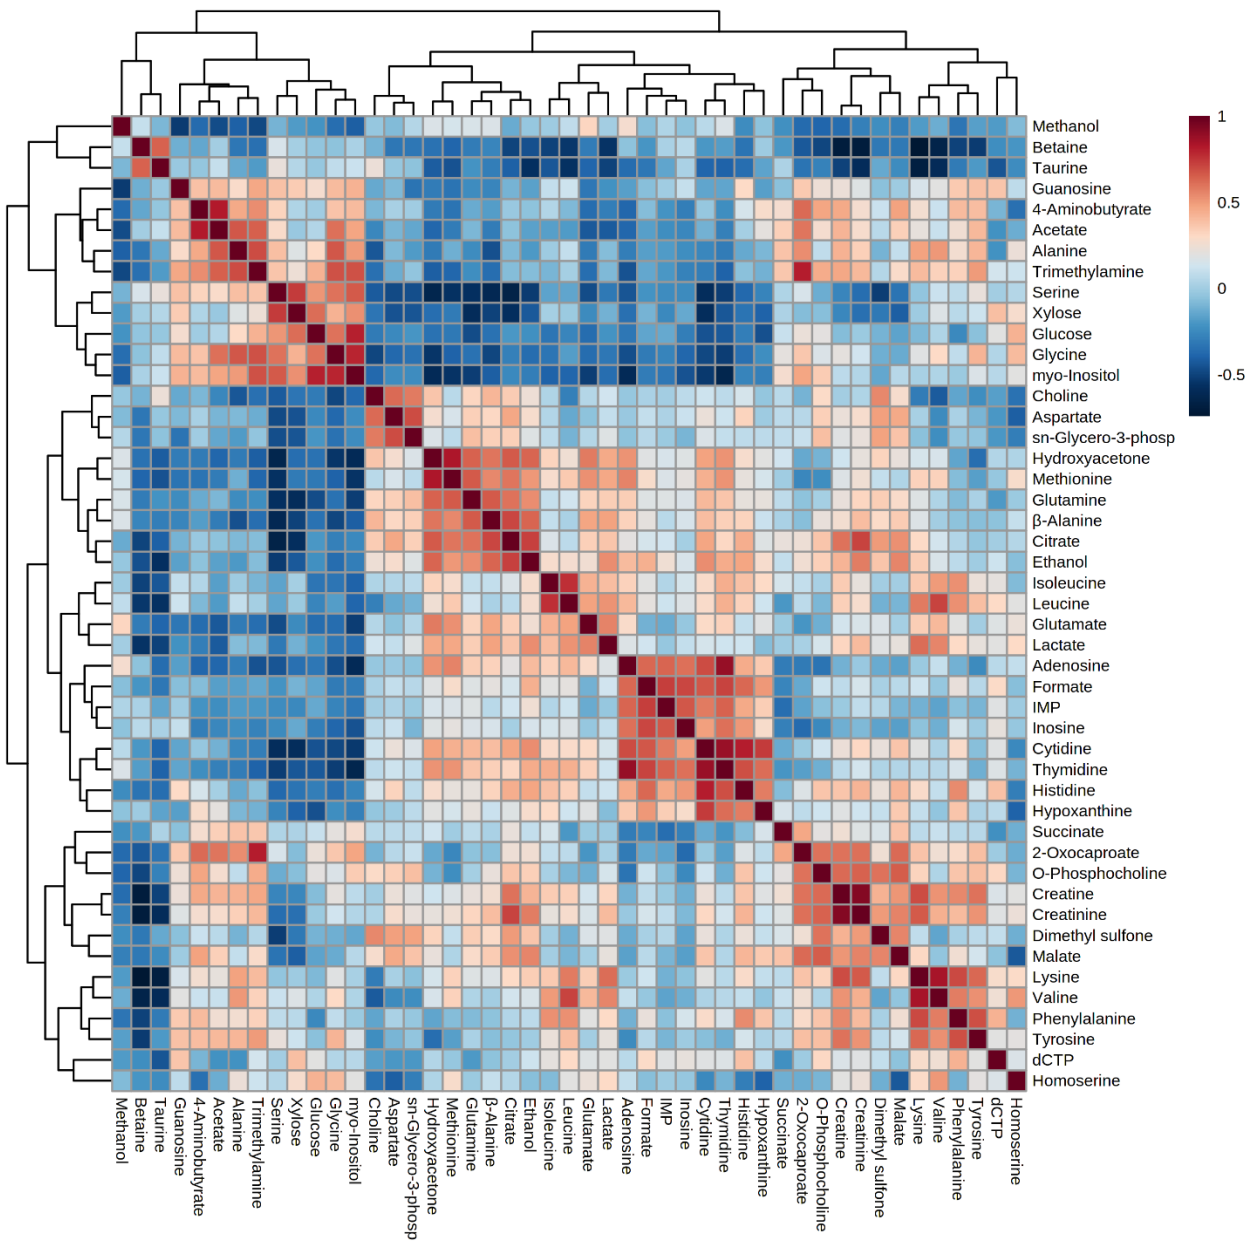

**Figure S2** The correlation relationship heatmap of the metabolites. Pearson correlations were applied for the heatmap.
